# Supplementary material for: Mn doped quantum dot sensitized solar cells with power conversion efficiency exceeding 9%
Source: Royal Society of Chemistry journal article supplement (doi:10.1039/c5ta09306f), 2015-12-02
Supplement: c5ta09306f1.pdf [file c5ta09306f1.pdf]

**Electronic Supplementary Information (ESI)**

**Mn doped quantum dots sensitized solar cells with power conversion efficiency exceeding 9%**

Jin Wang<sup>†</sup>, Yan Li<sup>†</sup>, Qing Shen<sup>‡,§</sup>, Takuya Izuishi<sup>‡</sup>, Zhenxiao Pan<sup>†</sup>, Ke Zhao<sup>†</sup>, and Xinhua Zhong<sup>†,\*</sup>

<sup>†</sup>Key Laboratory for Advanced Materials, Institute of Applied Chemistry, East China University of Science and Technology, Shanghai 200237, China

<sup>‡</sup>Department of Engineering Science, the University of Electro-Communications, 1-4-1 Chofugaoka, Chofu, Tokyo 182-8585, Japan

<sup>§</sup>Japan Science and Technology Agency (JST), 4-1-8 Honcho Kawaguchi, Saitama 332-0012, Japan

## Ligand Exchange with Water-Soluble TGA.

The ligand exchange strategy can be achieved according to a literature method.<sup>1</sup> Typically, 2 mmol of TGA was dissolved in 1.0 mL of methanol, and the solution was then adjusted to pH 10-11 with NaOH (30% in water). The TGA–methanol solution was then added into the as prepared QDs solution (20.0 mL of CH<sub>2</sub>Cl<sub>2</sub> containing 0.1 mmol of QDs in molecular unit) and stirred for about 2h until the complete reaction. Then 10.0 mL of deionized water was added into the reactor, and the stirring was continued for another 5 min, the TGA-capped water-soluble QDs was carried out for further purified by centrifugation and decantation with the addition of acetone, and the precipitate was re-dissolved in 1.5 mL deionized water. Finally, the PH of the TGA-capped CdSeTe (or Mn doped CdSeTe) QDs was adjusted to 11.0 for further use.

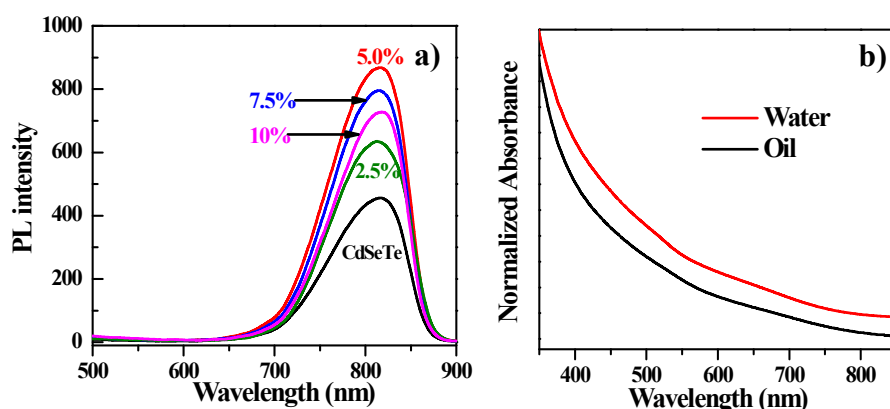

**Figure S1.** Absorption and PL emission spectra ( $\lambda_{\text{ex}} = 400 \text{ nm}$ ) of QD dispersions, respectively. (a) PL emission spectra ( $\lambda_{\text{ex}} = 400 \text{ nm}$ ) of CdSeTe and Mn:CdSeTe QDs corresponding to different nominal Mn contents in total cation component. (b) UV/Vis absorption spectra of Mn:CdSeTe QDs before (chloroform dispersion, black) and after phase transfer (aqueous dispersion, red).

## Reference

- [1] Yang, J. W.; Oshima, T.; Oshima, W.; Pan, Z. X.; Zhong, X. H.; Shen, Q. Influence of Linker Molecules on Interfacial Electron Transfer and Photovoltaic Performance of Quantum Dot Sensitized Solar Cells. *J. Mater. Chem. A* **2014**, *2*, 20882–20888

**Table S1.** Mn content in Mn:CdSeTe QD samples determined by ICP-AES and the corresponding nominal Mn concentration used in the synthesis of these samples.

| Nominal Mn concentration relative to Cd (mol %) | Mn concentration relative to Cd determined by ICP-AES (mol %) |
|-------------------------------------------------|---------------------------------------------------------------|
| 0                                               | 0                                                             |
| 2.50                                            | 0.32                                                          |
| 5.0                                             | 0.56                                                          |
| 7.5                                             | 0.60                                                          |
| 10                                              | 0.73                                                          |

**Table S2.** Average photovoltaic parameters of 5 cells in parallel for Mn:CdSeTe/ZnS based QDSCs corresponding to the different concentration of Mn in QDs.

| Mn initial molar concentration relative to Cd (mol %) | Mn content confirmed by ICP-AES (mol %) | $J_{sc}$ (mA/cm <sup>2</sup> ) | $V_{oc}$ (V) | FF (%) | PCE (%)   |
|-------------------------------------------------------|-----------------------------------------|--------------------------------|--------------|--------|-----------|
| 0                                                     | 0                                       | 20.40                          | 0.652        | 63.4   | 8.43±0.07 |
| 2.50                                                  | 0.32                                    | 20.58                          | 0.663        | 63.8   | 8.71±0.11 |
| 5.0                                                   | 0.56                                    | 20.78                          | 0.670        | 64.3   | 8.95±0.08 |
| 7.5                                                   | 0.60                                    | 20.62                          | 0.664        | 64.1   | 8.78±0.13 |
| 10                                                    | 0.73                                    | 20.50                          | 0.643        | 63.9   | 8.42±0.12 |

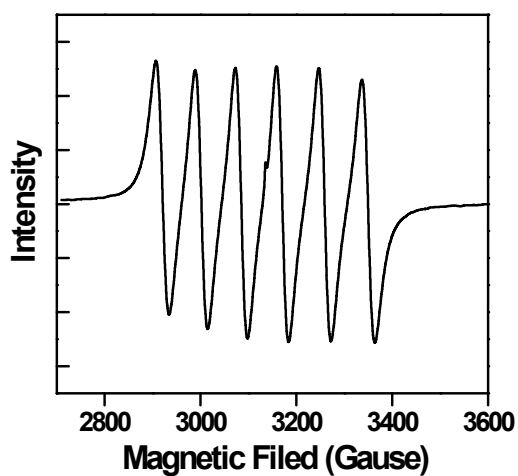

**Figure S2.** Continuous wave electron paramagnetic resonance (EPR) spectra of Mn: CdSeTe QDs at room temperature.

**Table S3.** The dependence of photovoltaic performance of Mn:QD/Mn:ZnS/SiO<sub>2</sub> QDSCs on the nominal Mn/Zn ratio in the ZnS passivation layer. Average photovoltaic parameters of 5 cells in parallel.

| Mn/Zn (%) | $J_{sc}$ (mA/cm <sup>2</sup> ) | $V_{oc}$ (V) | FF (%) | PCE (%)   |
|-----------|--------------------------------|--------------|--------|-----------|
| 0         | 20.72                          | 0.670        | 64.2   | 8.91±0.10 |
| 5.0       | 20.75                          | 0.678        | 64.4   | 9.06±0.08 |
| 10.0      | 20.83                          | 0.685        | 64.7   | 9.23±0.12 |
| 20.0      | 20.90                          | 0.678        | 64.0   | 9.07±0.07 |
| 40.0      | 20.78                          | 0.672        | 63.8   | 8.91±0.14 |

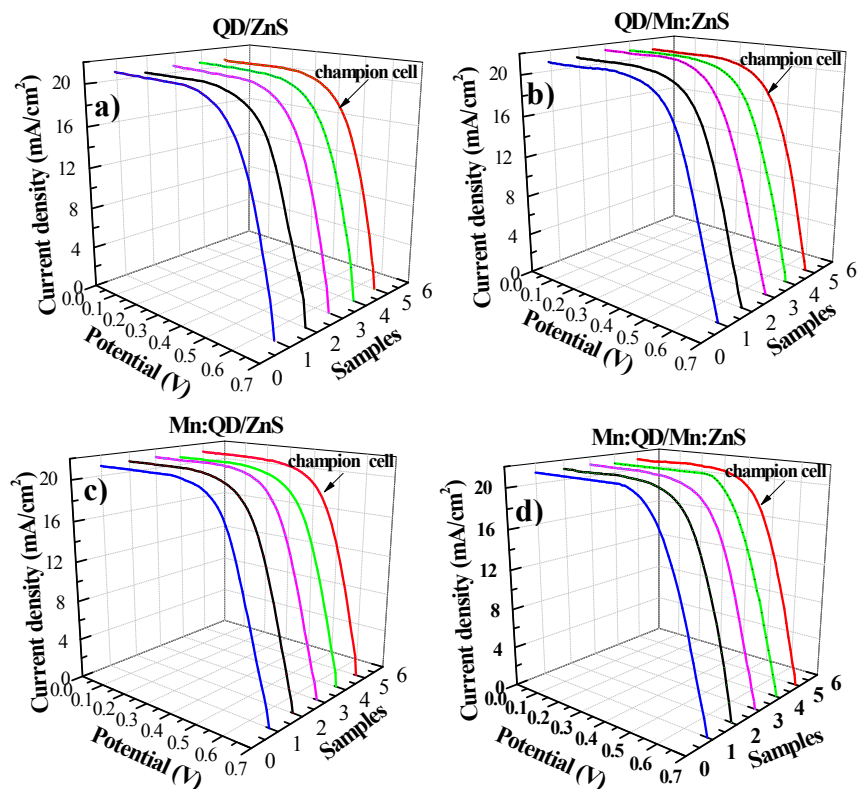

**Figure S3.**  $J$ - $V$  curves of various solar cells (a) QD/ZnS, (b) QD/Mn:ZnS, (c) Mn:QD/ZnS and (d) Mn:QD/Mn:ZnS.

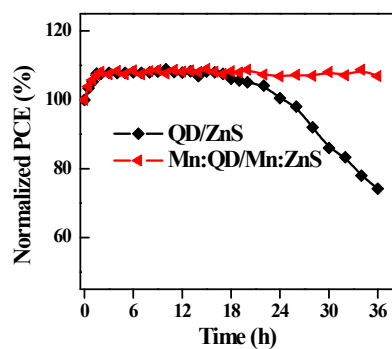

**Figure S4.** Cell efficiency normalized to the initial efficiency for samples with QD/ZnS and Mn:QD/Mn:ZnS based solar cells measured during 36 h period under continuous 1 sun illumination.

**Table S4.** Photovoltaic parameters derived from  $J$ - $V$  measurement for various solar cells  
(Each group has 5 devices in parallel).

| Electrode                     | $J_{sc}$ (mA/cm <sup>2</sup> ) | $V_{oc}$ (V) | FF (%) | PCE (%) |
|-------------------------------|--------------------------------|--------------|--------|---------|
| QD/ZnS/SiO <sub>2</sub>       | 20.32                          | 0.655        | 63.0   | 8.39    |
|                               | 20.49                          | 0.650        | 63.3   | 8.43    |
|                               | 20.46                          | 0.654        | 63.9   | 8.55    |
|                               | 20.51                          | 0.653        | 63.1   | 8.45    |
|                               | 20.36                          | 0.651        | 63.4   | 8.40    |
| QD/Mn:ZnS/SiO <sub>2</sub>    | 20.52                          | 0.667        | 63.8   | 8.73    |
|                               | 20.55                          | 0.664        | 63.5   | 8.66    |
|                               | 20.60                          | 0.668        | 64.1   | 8.82    |
|                               | 20.62                          | 0.665        | 63.6   | 8.72    |
|                               | 20.56                          | 0.668        | 63.3   | 8.69    |
| Mn:QD/ZnS/SiO <sub>2</sub>    | 20.73                          | 0.669        | 64.4   | 8.93    |
|                               | 20.79                          | 0.674        | 64.5   | 9.04    |
|                               | 20.64                          | 0.668        | 64.2   | 8.85    |
|                               | 20.75                          | 0.666        | 64.0   | 8.84    |
|                               | 20.68                          | 0.672        | 63.9   | 8.88    |
| Mn:QD/Mn:ZnS/SiO <sub>2</sub> | 20.88                          | 0.687        | 65.5   | 9.40    |
|                               | 20.78                          | 0.684        | 64.2   | 9.13    |
|                               | 20.91                          | 0.680        | 64.5   | 9.17    |
|                               | 20.80                          | 0.686        | 64.4   | 9.19    |
|                               | 20.75                          | 0.689        | 64.9   | 9.28    |

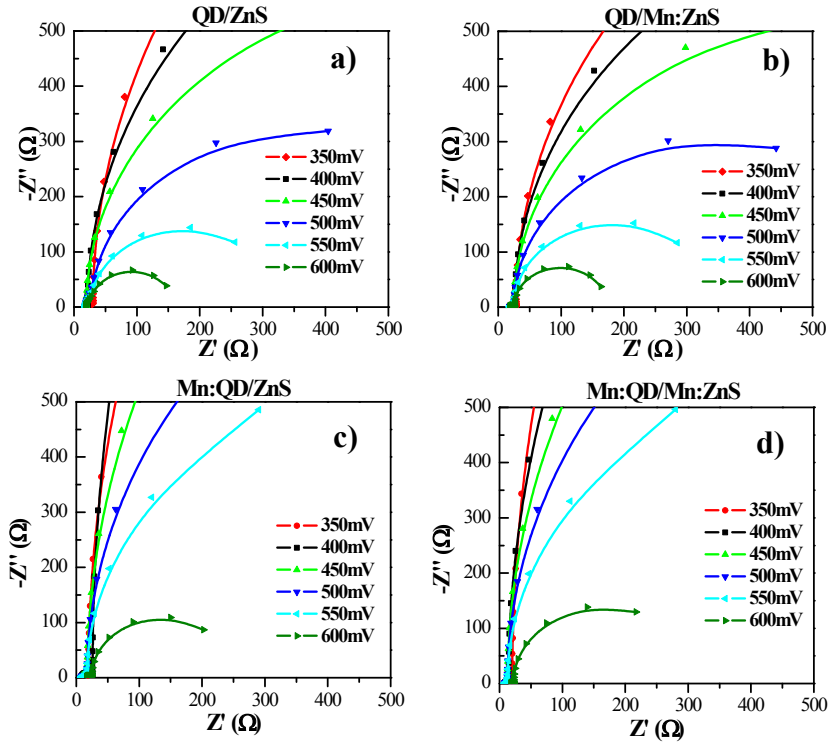

**Figure S5.** Nyquist curves under different bias voltages for QDSCs with different configurations: (a) QD/ZnS, (b) QD/Mn:ZnS, (c) Mn:QD/ZnS and (d) Mn:QD/Mn:ZnS.

**Table S5.** Impedance values at a  $-0.6$  V forward bias for photoanodes subjected to different electrodes. Series resistance  $R_s$ , charge transfer resistance  $R_w$ , recombination resistance  $R_{rec}$ , and electron lifetime  $\tau_n$ .

| Electrode     | $R_s$<br>$\Omega$ | $R_w$<br>$\Omega$ | $R_{rec}$<br>$\Omega$ | $R_{rec}/R_w$ | $\tau_n$<br>s |
|---------------|-------------------|-------------------|-----------------------|---------------|---------------|
| QD/ZnS        | 19.62             | 26.89             | 101.5                 | 3.8           | 0.45          |
| QD/Mn:ZnS     | 19.83             | 33.15             | 128.1                 | 3.9           | 0.60          |
| Mn:QD/ZnS     | 20.15             | 29.51             | 209.3                 | 7.1           | 0.88          |
| Mn:QD/Mn: ZnS | 20.02             | 35.03             | 278.7                 | 8.0           | 1.46          |
